# Supplementary material for: De novo assembly of a chromosome‐level reference genome of red‐spotted grouper (Epinephelus akaara) using nanopore sequencing and Hi‐C
Source: PubMed Central journal article supplement — Mol Ecol Resour. 2019 Aug 14;19(6):1461–9. doi: 10.1111/1755-0998.13064 (PMC6899872; doi:10.1111/1755-0998.13064), 2019-08-14
Supplement: MEN-19-1461-s001.pdf [file MEN-19-1461-s001.pdf]

## Supplemental Information for

### *De novo* assembly of a Chromosome-Level Reference Genome of Red Spotted

### Grouper (*Epinephelus akaara*) using Nanopore sequencing and Hi-C

Hui Ge<sup>1,3#</sup>, Keping Lin<sup>1#</sup>, Mi Shen<sup>2#</sup>, Shuiqing Wu<sup>1</sup>, Yilei Wang<sup>3\*</sup>, Ziping Zhang<sup>6</sup>, Zhiyong

Wang<sup>3</sup>, Yong Zhang<sup>4</sup>, Zhen Huang<sup>5</sup>, Chen Zhou<sup>1</sup>, Qi Lin<sup>1</sup>, Jianshao Wu<sup>1</sup>, Lei Liu<sup>2</sup>, Jiang Hu<sup>2\*</sup>,

Zhongchi Huang<sup>1\*</sup>, Leyun Zheng<sup>1\*</sup>

**Table S1 Summary of clean reads generated from genome and transcriptome sequencing by Illumina Hiseq Xten**

| Application              | Sample      | Clean reads | Clean Bases(bp) | Q30  |
|--------------------------|-------------|-------------|-----------------|------|
| Genome Survey and Polish | D1703681-WY | 362,233,076 | 54,697,194,476  | 0.93 |
| RNA-Seq                  | Fbrain      | 110,890,780 | 16,596,641,393  | 0.97 |
|                          | Gill        | 108,185,650 | 16,193,976,325  | 0.97 |
|                          | Gonad       | 125,851,234 | 18,798,867,506  | 0.93 |
|                          | Heart       | 104,714,712 | 15,661,477,121  | 0.97 |
|                          | Kidney      | 126,727,978 | 18,971,576,481  | 0.97 |
|                          | Liver       | 102,898,460 | 15,403,334,426  | 0.97 |
|                          | Mbrain      | 97,238,278  | 14,553,759,266  | 0.97 |
|                          | Muscle      | 106,207,434 | 15,895,544,144  | 0.97 |
|                          | Spleen      | 113,457,912 | 16,987,591,796  | 0.97 |
| Hi-C                     | D1703681-WY | 769,598,162 | 112,826,974,259 | 0.95 |

**Table S2 Estimation of genome size based on 17-mer statistics**

| K-mer Value | K-mer Number   | K-mer Depth | Genome Size (Gb) | Heterozygosity Rate (%) |
|-------------|----------------|-------------|------------------|-------------------------|
| 17          | 48,893,735,532 | 44          | 1.111            | 0.375                   |

**Table S3 Sequencing statistics from the Oxford Nanopore GridION X5 platform**

| Sample | Cells | Pass Reads<br>Bases(Gb) | Pass Reads Mean<br>Length(kb) | Pass Reads N50<br>Length(kb) | Pass Reads Max<br>Length(kb) |
|--------|-------|-------------------------|-------------------------------|------------------------------|------------------------------|
| 19     |       | 106.29                  | 18.35                         | 26                           | 184                          |

**Table S4 Comparisons of statistics among the well-constructed fish and *E. akaara* genome assembly**

| Species                         | Assembled genome size (Mb) | Contig Number         | Contig N50 (Kb) | Scaffold Number      | Scaffold N50 (Mb) |
|---------------------------------|----------------------------|-----------------------|-----------------|----------------------|-------------------|
| <i>Epinephelus akaara</i>       | 1,135                      | 2,055                 | 5,194           | 24                   | 46.0              |
| <i>Oreochromis niloticus</i>    | 1,003                      | 2,960                 | 3,325           | -                    | -                 |
| <i>Amphiprion percula</i>       | 909                        | 1,045                 | 3,120           | 365                  | 38.4              |
| <i>Lates calcarifer</i>         | 587                        | 3,917                 | 1,066           | 24                   | 25.8              |
| <i>Amphiprion ocellaris</i>     | 881                        | 7,810                 | 324             | 6,404                | 0.4               |
| <i>Monopterus albus</i>         | 635                        | 117,579<br>(> 100 bp) | 22              | 62,978<br>(> 100 bp) | 2.1               |
| <i>Acanthopagrus schlegelii</i> | 688                        | 115,091<br>(> 100 bp) | 17              | 31,359<br>(> 100 bp) | 7.6               |
| <i>Gadus morhua</i> NEWB454     | 656                        | -                     | 6               | -                    | 1.3               |
| <i>Oryzias melastigma</i>       | 779                        | -                     | -               | 8,775                | 4.4               |

**Table S5 Assessment of genome completeness by BUSCO**

| Type                                | Number | Percentage (%) |
|-------------------------------------|--------|----------------|
| Complete BUSCOs (C)                 | 4,437  | 96.8           |
| Complete and single-copy BUSCOs (S) | 4,271  | 93.2           |
| Complete and duplicated BUSCOs (D)  | 166    | 3.6            |
| Fragmented BUSCOs (F)               | 69     | 1.5            |
| Missing BUSCOs (M)                  | 78     | 1.7            |
| Total BUSCO groups searched         | 4,584  | -              |

**Table S6 Summary of the transcriptomes and their mapping rate on the genome assembly**

| <b>Sample</b> | <b>Total Reads Number</b> | <b>Mapped Reads Number</b> | <b>Mapping Rate (%)</b> |
|---------------|---------------------------|----------------------------|-------------------------|
| Gill          | 108185650                 | 97475941                   | 90.1%                   |
| Spleen        | 113457912                 | 104544451                  | 92.1%                   |
| Kidney        | 126727978                 | 116711449                  | 92.1%                   |
| Muscle        | 106207434                 | 100875022                  | 95.0%                   |
| Fbrain        | 110890780                 | 101239917                  | 91.3%                   |
| Heart         | 104714712                 | 86527230                   | 82.6%                   |
| Mbrain        | 97238278                  | 87390917                   | 89.9%                   |
| Liver         | 102898460                 | 96202059                   | 93.5%                   |
| Gonad         | 125851234                 | 119382396                  | 94.9%                   |
| CD40B_L6_I034 | 64620162                  | 55420144                   | 85.8%                   |
| CD40G         | 53635500                  | 48114193                   | 89.7%                   |
| CD51B_L6_I036 | 58997712                  | 50852786                   | 86.2%                   |
| CD51G         | 49393822                  | 44039822                   | 89.2%                   |

**Table S7 Statistics of chromosome length distribution based on clustered scaffolds**

| <b>Chr</b>   | <b>Size</b>         | <b>Scaffold Num</b> |
|--------------|---------------------|---------------------|
| Chr01        | 53,736,897          | 54                  |
| Chr02        | 53,007,317          | 45                  |
| Chr03        | 52,524,049          | 97                  |
| Chr04        | 52,478,662          | 56                  |
| Chr05        | 50,330,081          | 61                  |
| Chr06        | 50,044,055          | 57                  |
| Chr07        | 49,122,225          | 58                  |
| Chr08        | 48,070,050          | 42                  |
| Chr09        | 46,462,825          | 39                  |
| Chr10        | 46,206,632          | 60                  |
| Chr11        | 46,067,422          | 47                  |
| Chr12        | 46,028,906          | 34                  |
| Chr13        | 45,677,884          | 70                  |
| Chr14        | 45,222,162          | 58                  |
| Chr15        | 45,116,380          | 52                  |
| Chr16        | 45,021,781          | 64                  |
| Chr17        | 44,981,524          | 59                  |
| Chr18        | 43,126,265          | 27                  |
| Chr19        | 41,713,854          | 40                  |
| Chr20        | 40,445,100          | 81                  |
| Chr21        | 39,359,364          | 40                  |
| Chr22        | 38,616,317          | 34                  |
| Chr23        | 35,838,671          | 31                  |
| Chr24        | 25,806,605          | 66                  |
| <b>Total</b> | <b>1,085,005028</b> | <b>1,272</b>        |

**Table S8 Summary of the SSR search results**

| <b>Repeat type</b>    | <b>Unit size (repeat number)</b> | <b>Number</b> |
|-----------------------|----------------------------------|---------------|
| mono-nucleotide       | 1 ( $\geq 10$ )                  | 190,558       |
| Di-nucleotide         | 2 ( $\geq 6$ )                   | 261,169       |
| Tri-nucleotide        | 3 ( $\geq 5$ )                   | 61,227        |
| Tetra-nucleotide      | 4 ( $\geq 5$ )                   | 25,893        |
| Penta-nucleotide      | 5 ( $\geq 5$ )                   | 5,335         |
| Hexa-nucleotide       | 6 ( $\geq 5$ )                   | 1,104         |
| Total identified SSRs | -                                | 545,286       |

**Table S9 summary statistics of repeat annotation from different types**

| Type              | Repeat Size(bp) | % of genome |
|-------------------|-----------------|-------------|
| Ltr_finder        | 64,043,800      | 5.64        |
| Rebase            | 152,946,049     | 13.47       |
| RepeatModeler     | 336,694,250     | 29.65       |
| RepeatProteinMask | 71,391,956      | 6.29        |
| Trf               | 60,867,392      | 5.36        |
| Total             | 488,505,111     | 43.02       |

**Table S10 Summary statistics of gene sets compared with other species**

| Specie               | Total number of gene | Average gene length(bp) | Average CDS length(bp) | Average exons number per gene | Average exon length(bp) | Average intron length(bp) |
|----------------------|----------------------|-------------------------|------------------------|-------------------------------|-------------------------|---------------------------|
| <i>E. akaara</i>     | 23,923               | 23,162.39               | 1,791.15               | 10.9                          | 164.27                  | 2,157.86                  |
| <i>C.idellus</i>     | 32,703               | 10,362.66               | 1,385.42               | 7.65                          | 181.13                  | 1,350.19                  |
| <i>C.semilaevis</i>  | 21,253               | 11,471.66               | 1,791.67               | 10.66                         | 168.01                  | 1,001.64                  |
| <i>D. rerio</i>      | 24,884               | 25,370.93               | 1,651.52               | 9.49                          | 174.06                  | 2,794.47                  |
| <i>G. aculeatus</i>  | 20,765               | 8,459.55                | 1,549.16               | 10.41                         | 148.88                  | 734.70                    |
| <i>L. calcarifer</i> | 25,114               | 12,662.32               | 1,773.31               | 10.47                         | 169.41                  | 1,150.14                  |
| <i>O. niloticus</i>  | 28,892               | 14,577.62               | 1,722.03               | 9.55                          | 180.24                  | 1,502.88                  |
| <i>O. latipes</i>    | 19,686               | 12,154.68               | 1,516.24               | 10.26                         | 147.77                  | 1,148.79                  |
| <i>T. rubripes</i>   | 18,508               | 7,499.15                | 1,694.14               | 11.11                         | 152.55                  | 574.45                    |

**17-mer Depth Distribution Curve**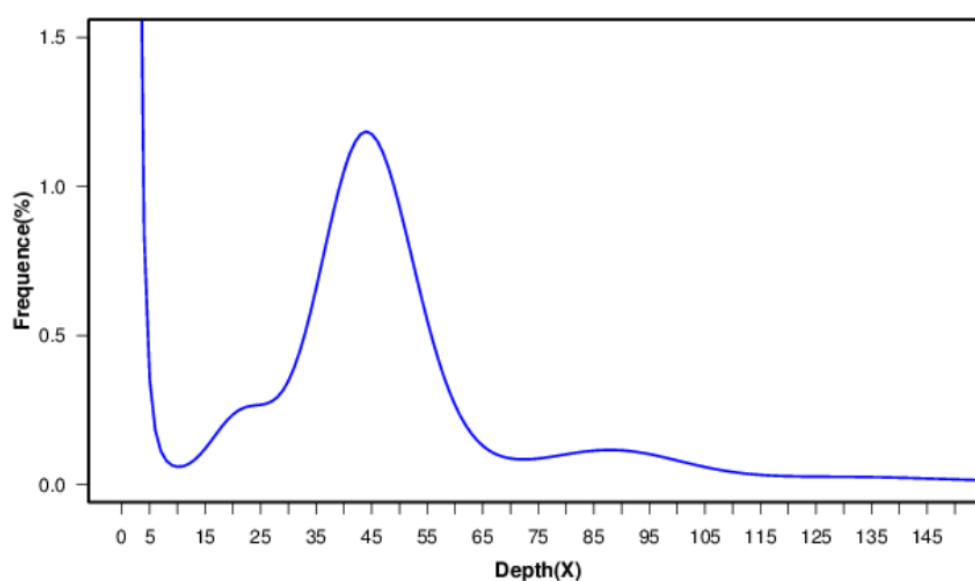**Figure S1. Frequency distribution of the 17-mer graph analysis used to estimate the size of the *E. akaara* genome.**

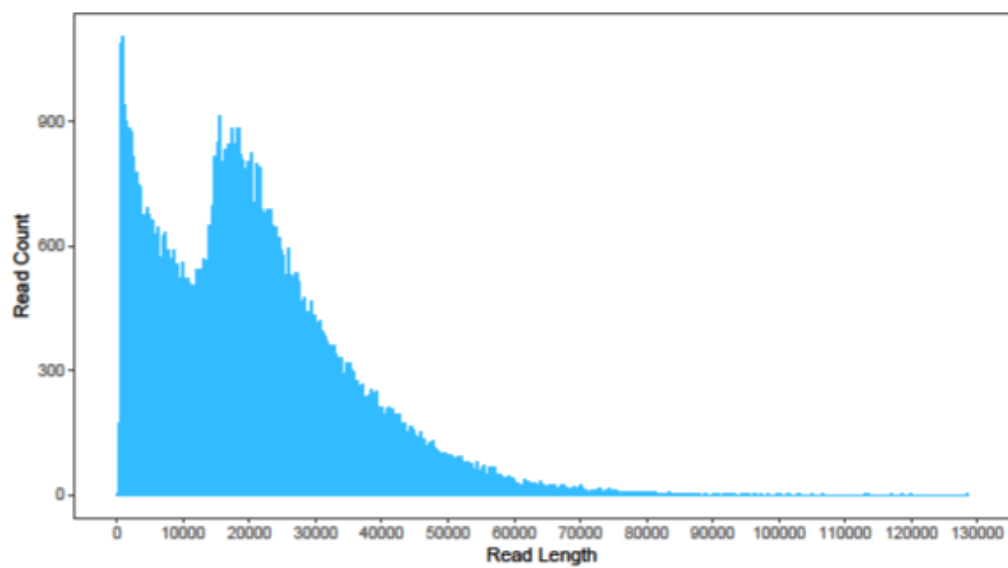

**Figure S2. Passed read length distribution of Oxford Nanopore sequencing data**
